# Supplementary material
Source: HighWire-hosted journal article supplement (https://www.cmajopen.ca/highwire/filestream/81297/field_highwire_adjunct_files/0/2019-0063-1-at.pdf)
Supplement: 2019-0063-1-at.pdf [file 2019-0063-1-at.pdf]

**Appendix 1 (as supplied by the authors): Health Care Experience Survey questionnaire**

# **HEALTH CARE EXPERIENCE SURVEY**

## **Questionnaire**

**Effective April 2017**

**Contents**

WARM-UP QUESTIONS ..... 3

RESPONDENT'S HEALTH ..... 4

PRIMARY CARE PROVIDER ..... 5

NO DOCTOR SECTION..... 7

ACCESS TO PRIMARY CARE..... 10

ACCESS TO CARE WHEN SICK ..... 13

PATIENT EXPERIENCE ..... 15

INTEGRATION ..... 17

    SPECIALISTS..... 17

    TESTS ..... 18

    HOSPITALIZATION ..... 18

    PRESCRIPTION MEDICATION ..... 18

BLOCK FEES ..... 20

USE OF EMERGENCY AND WALK-IN..... 24

    EMERGENCY ..... 24

    WALK-IN..... 25

HOME CARE..... 27

HOUSEHOLD COMPOSTION..... 29

CHILDREN'S SECTION ..... 30

    CHILDREN'S ACCESS TO CARE WHEN SICK ..... 30

    CHILDREN'S USE OF EMERGENCY ..... 31

    CHILDREN'S USE OF A WALK-IN..... 31

SOCIODEMOGRAPHICS ..... 32

POSTAL CODE ..... 36

PERMISSION TO LINK/FOLLOW UP ..... 37

EVALUATION ..... 38

**INTERVIEWER: Enter respondent's gender please**

- 1 Male
- 5 Female

## **WARM-UP QUESTIONS**

**w1. The first question is: In general, how satisfied are you with health care in your community: would you say very satisfied, somewhat satisfied, not very satisfied or not satisfied at all?**

- 1 very satisfied
- 2 somewhat satisfied
- 3 not very satisfied
- 4 not satisfied at all
- 8 don't know
- 9 refused

**w2. In general, over the last five years do you think the quality of health care provided in your community has improved a lot, improved a little, stayed about the same, become a little worse or become a lot worse?**

- 1 improved a lot
- 2 improved a little
- 3 stayed about the same
- 4 become a little worse
- 5 become a lot worse
- 8 don't know
- 9 refused

## RESPONDENT'S HEALTH

**rh\_1. Now some questions about your health. In general, would you describe your own health as excellent, very good, good, fair, or poor?**

- 1 excellent
- 2 very good
- 3 good
- 4 fair
- 5 poor
- 8 don't know
- 9 refused

**rh\_2. Have you ever been told by a doctor or other health care professional that you have any of the following long-term conditions:**

- a. Arthritis?
- b. Asthma or chronic lung disease such as chronic bronchitis, emphysema or COPD?
- c. Cancer?
- d. Depression, anxiety or other mental health problems?
- e. Diabetes?
- f. Heart disease or a heart attack?
- g. High blood pressure or hypertension?
- h. High cholesterol?
- i. Any other long-term disease or health problem, please specify?

- 1 yes
- 5 no
- 8 don't know
- 9 refused

## PRIMARY CARE PROVIDER

**fd\_1a. Do you have a family doctor, a general practitioner or GP, or nurse practitioner that you see for regular check-ups, when you are sick and so on?**

- 1 yes
- 5 no
- 8 don't know
- 9 refused

<if fd\_1a in (5,8,9) then go to fd\_1b>

< if fd\_1a = 1 then go to fd\_5>

**fd\_1b. Do you see any type of health care provider, for your health, on a regular basis?**

- 1 yes
- 5 no
- 8 don't know
- 9 refused

<if fd\_1b in (5,8,9) then go to nd\_1>

<if rh\_2(a,b,c,d,e,f,g,h,i) in (5,8,9) then go to fd\_3>

**fd\_2. Is this the same person you see for your [specify long\_term\_condition(s)]?**

- 1 yes
- 5 no
- 8 don't know
- 9 refused

**fd\_3. Do you think of this person as your regular health care provider or family doctor?**

- 1 yes
- 5 no
- 8 don't know
- 9 refused

<if fd\_3 in (5,8,9) then go to nd\_1>

**fd\_5. How many years have you been seeing your provider?**

- 0 never actually saw
- 1 for one year or less
- 2-80 enter number of years
- 81 eighty-one or more years
- 98 don't know
- 99 refused

<if fd\_1a = 1 or fd\_3=1 then famdoc = 1>

<else famdoc = 0>

## NO DOCTOR SECTION

<if famdoc = 1 then go to access\_1>

### nd\_1. Have you ever had a family doctor?

- 1 yes
- 5 no
- 8 don't know
- 9 refused

<if nd\_1 in (5,8,9) then go to nd\_3>

### nd\_2. Why do you no longer have a family doctor?

- 1 respondent moved and it is no longer practical to see that doctor, have not found new doctor
- 2 respondent was not satisfied with family doctor, they decided not to see him/her again
- 3 switched to using some form of clinic/walk in clinic/clinic at hospital, other clinic, easier to use/get to clinic, better "service," etc.
- 4 doctor retired/deceased/changed practice type/sick/pregnant
- 5 doctor moved from area/cannot locate
- 6 did not see doctor often, did not see for long time, doctor dropped patient, etc.
- 7 negative experience with family/other doctor/health care system
- 8 none available/hard to find
- 0 other (specify)
- 98 don't know
- 99 refused

### nd\_3. Would you like to have a family doctor?

- 1 yes
- 5 no
- 8 don't know
- 9 refused

<if nd\_3 in (5,8,9) then go to nd\_6>

### nd\_4. Have you tried to find a family doctor?

- 1 yes
- 5 no
- 8 don't know
- 9 refused

<if nd\_1 = 5 then go to nd\_7>



**nd\_6. Why have you never had a family doctor?**

- 1 no family doctors (or equivalent) available in the area
- 2 family doctors (or equivalent) in the area are not taking new patients
- 3 want family doctor to be the same sex (gender) as me, cannot/have not found one
- 4 have not tried to find/contact one
- 5 not covered by OHIP (wait listed)
- 6 use clinic (walk in or other clinic type)
- 7 do not need doctor / never sick
- 0 other, specify
- 98 don't know
- 99 refused

**nd\_8. If you needed to see a doctor, for example to get a regular check-up or medical exam, because you were not feeling well, had a cold or the flu, to get a referral to see a specialist, and so on, where would you go for help?**

- 1 walk-in clinic/clinic/after-hours clinic
- 2 emergency department at hospital/hospital
- 3 would see/try to see family doctor of another household member/friend/etc.
- 4 family medicine center at/affiliated with hospital or university
- 5 hospital outpatient department
- 6 community health center/women's health centre/centre at work/school/university
- 7 doctor/clinic that specializes in alternative medicine (naturopath, herbalist, etc.)
- 8 call Telehealth
- 0 other, specify
- 97 respondent insists they do not/would not need care
- 98 don't know
- 99 refused

**nd\_9. Not counting yearly check-ups or monitoring of an ongoing health issue, in the last 12 months did you want to see a doctor because you were sick or were concerned that you had a health problem?**

- 1 yes
- 5 no
- 8 don't know
- 9 refused

<if nd\_9 in (5,8,9) then go to er\_1>

**nd\_10. Did you actually see a doctor?**

- 1 yes
- 5 no
- 8 don't know
- 9 refused

<if nd\_10 in (5,8,9) then go to er\_1>

**nd\_11. How many days did it take from when you first tried to see a doctor to when you actually SAW them?**

0 saw the doctor the same day

1 saw doctor next day

2-19 Enter number of days

20 twenty or more days

98 don't know

99 refused

## ACCESS TO PRIMARY CARE

**access\_1. Have you called or tried to call your provider office with a medical question or concern during the day on a Monday to Friday in the last 12 months?**

- 1 yes
- 5 no
- 8 don't know
- 9 refused

<if access\_1 in (5,8,9) then go to access\_3>

**access\_2. How often did your provider or someone else in the office speak to you when you called or get back to you the same day?**

- 1 always
- 2 often
- 3 sometimes
- 4 rarely
- 5 never
- 6 volunteers 'depends on what they called for'
- 8 don't know
- 9 refused

**access\_3. In the last 12 months, have you emailed your provider with a medical question?**

- 1 yes
- 5 no
- 6 doctor's office does not offer email
- 7 I don't have email or computer
- 8 don't know
- 9 refused

<if access\_3 = 6 then go to access\_4a>

<if access\_3=7 then access\_4=7 and go to access\_5>

<else access\_4b>

**access\_4a. Could you make an appointment with your provider on a website?**

**access\_4b. Could you make an appointment with your provider by email or on a website?**

- 1 yes
- 5 no
- 6 doctor's office does not offer email/website
- 7 I don't have email or computer
- 8 don't know
- 9 refused

**access\_5. The last time when you needed medical care in the evening, on a weekend, or on a public holiday, how easy or difficult was it to get care without going to the emergency department?**

- 1 very easy
- 2 somewhat easy
- 3 somewhat difficult
- 4 very difficult
- 6 volunteers never tried to do this/never needed care
- 8 don't know
- 9 refused

**access\_6. Not including hospital emergency departments, does your provider have an after-hours clinic where patients can be seen by or talk to a doctor or nurse when the provider's office is closed?**

- 1 yes
- 5 no
- 8 don't know
- 9 refused

<if access\_5 = 6 then go to access\_10>

**access\_10. Will your provider make house calls; that is, come to your home to see you?**

- 1 yes
- 5 no
- 8 don't know
- 9 refused

**access\_9. In the last 12 months, was there a time when it would have been better for your health if your provider had come to your home to see you rather than you going to your provider to see them?**

- 1 yes
- 5 no
- 8 don't know
- 9 refused

## ACCESS TO CARE WHEN SICK

**sick\_1. Not counting yearly check-ups or monitoring of an ongoing health issue, in the last 12 months did you want to see your provider because you were sick or were concerned that you had a health problem?**

- 1 yes
- 5 no
- 8 don't know
- 9 refused

<if sick\_1 in (5,8,9) then go to exp\_1>

**sick\_2. Did you actually see your provider or someone else in their office?**

- 1 yes saw own doctor
- 2 yes saw someone else in office
- 3 saw both provider and someone else (and others)
- 5 no
- 8 don't know
- 9 refused

<if sick\_2 = 5 then go to sick\_5>

<if sick\_2 in (8,9) then go to exp\_1>

**sick\_3. How many days did it take from when you first tried to see your provider to when you actually saw them or someone else in their office?**

- 0 saw the doctor the same day
- 1 saw doctor next day
- 2-19 Enter number of days
- 20 twenty or more days
- 98 don't know
- 99 refused

**sick\_6. Would you say the length of time it took between making the appointment and the actual visit was about right, somewhat too long, or much too long?**

- 1 about right
- 2 somewhat too long
- 3 much too long
- 5 other (e.g., if they felt it was too short)
- 8 don't know
- 9 refused

**sick\_4. Overall, would you say the medical care that you received from your provider was excellent, very good, good, fair, or poor?**

- 1 excellent
- 2 very good
- 3 good
- 4 fair
- 5 poor
- 8 don't know
- 9 refused

<if sick\_4 in (1,2,3,4,5,8,9) then go to exp\_1>

**sick\_5. Please tell me why you did not see the [fill fd\_type]?**

1. doctor not available when needed (as it was a weekend or evening, doctor was away, on vacation, ill, booked, etc.)/had to wait too long
2. got advice from doctor's office to see a specialist or doctor at another location (such as a hospital, clinic, etc.)
3. went to emergency / went to the hospital
4. problem went away / not that serious
5. went to a clinic, any type (walk in, community clinic, at work, etc.)
6. called Telehealth
7. other reason (specify, include did not have a doctor at that time here)

- 0 no mention
- 1 stated
- 8 don't know
- 9 refused

## PATIENT EXPERIENCE

**exp\_1. When you see your provider or someone else in their office, how often do they know important information about your medical history?**

- 1 always
- 2 often
- 3 sometimes
- 4 rarely
- 5 never
- 6 r volunteers it depends on who they see and/or what they are there for
- 7 never saw family doctor or anyone in their office
- 8 don't know
- 9 refused

<if exp\_1 = 7 then go to spec\_1>

**exp\_2. When you see your provider or someone else in their office, how often do they give you an opportunity to ask questions about recommended treatment?**

- 1 always
- 2 often
- 3 sometimes
- 4 rarely
- 5 never
- 6 volunteers it depends on who they see and/or what they are there for
- 7 volunteers not using/on any treatments/not applicable
- 8 don't know
- 9 refused

**exp\_3. When you see your provider or someone else in their office, how often do they spend enough time with you?**

- 1 always
- 2 often
- 3 sometimes
- 4 rarely
- 5 never
- 6 volunteers it depends on who they see and/or what they are there for
- 8 don't know
- 9 refused



**exp\_4. When you see your provider or someone else in their office, how often do they involve you as much as you want to be in decisions about your care and treatment?**

- 1 always
- 2 often
- 3 sometimes
- 4 rarely
- 5 never
- 6 volunteers it depends on who they see and/or what they are there for
- 7 volunteers no decisions required on care or treatment/not applicable
- 8 don't know
- 9 refused

**exp\_5. When you see your provider or someone else in their office, how often do they explain things in a way that is easy to understand?**

- 1 always
- 2 often
- 3 sometimes
- 4 rarely
- 5 never
- 6 r volunteers it depends on who they see and/or what they are there for
- 8 don't know
- 9 refused

## INTEGRATION

### SPECIALISTS

**spec\_1. In the past 12 months, have you been advised by your provider to see a specialist?**

- 1 yes
- 5 no
- 8 don't know
- 9 refused

<if spec\_1 in (5,8,9) then go to int\_1>

**spec\_2. After you were advised to see a specialist, how many days, weeks or months did you have to wait for an appointment?**

- Days:
- Weeks:
- Months:
- Years:
- 9997 never got an appointment/still waiting/etc.
- 9998 don't know
- 9999 refused

<if spec\_2 = 9997 then go to int\_1>

**spec\_4. When you saw the specialist, did he/she have basic medical information from your provider about the reason for your visit?**

- 1 yes
- 5 no
- 7 never got an appointment/still waiting, etc.
- 8 don't know
- 9 refused

**spec\_6. After you saw the specialist, did your provider seem informed and up-to-date about the care you got from the specialist?**

- 1 yes
- 5 no
- 7 did not see provider since seeing specialist
- 8 don't know
- 9 refused

## TESTS

**int\_1. In the last 12 months, when receiving care for a medical problem, was there ever a time when test results were not available at the time of a scheduled appointment with your provider?**

- 1 yes
- 5 no
- 7 did not receive care for medical problem/no tests in last 12 months/not applicable
- 8 don't know
- 9 refused

## HOSPITALIZATION

**int\_2. In the last 12 months, have you been hospitalized overnight?**

- 1 yes
- 5 no
- 8 don't know
- 9 refused

<if int\_2 in (5,8,9) then go to pres\_1>

**int\_3. After you were discharged from hospital, did your provider seem informed and up-to-date about the care you received in the hospital?**

- 1 yes
- 5 no
- 6 have not seen provider since discharged from hospital
- 7 did not receive care for medical problem/no tests in last 12 months/not applicable
- 8 don't know
- 9 refused

## PRESCRIPTION MEDICATION

**pres\_1. Are you taking any prescription medicines on a regular or on-going basis?**

- 1 yes
- 5 no
- 8 don't know
- 9 refused

<if pres\_1 in (5,8,9) then go to bf\_1>

**pres\_2. How many different prescription medicines are you taking on a regular or on-going basis?**

- 1 one
- 2 two
- 3 three
- 4 four or more
- 8 don't know
- 9 refused

<if pres\_2 in (1,2,3,4) then go to bf\_1>

**pres\_3. In the last 12 months, has your provider reviewed and discussed with you the prescription medicine(s) you are using?**

- 1 yes (includes reviewed, or discussed, or both)
- 5 no
- 8 don't know
- 9 refused

## BLOCK FEES

Intro: Patients sometimes need services that are not paid for by OHIP. Examples include sick notes for work; copies or transfers of medical records; and prescription refills over the phone. Patients are responsible to pay for these uninsured services. Some physicians ask patients to pay for these services individually (or each time) they use them, and some physicians offer patients a lump sum payment option, often called a “block fee”, for these services.

**bf\_1. Have you ever been asked by your provider or their office to pay for sick notes, copies of your medical records, and prescription refills as YOU needed them?**

- 1 yes
- 5 no
- 8 don't know
- 9 refused

<if bf\_1 in (5,8,9) then go to bf\_5>

**bf\_2. Have you paid for one or more of these uninsured services in the last 3 years?**

- 1 yes
- 5 no
- 8 don't know
- 9 refused

<if bf\_2 in (5,8,9) then go to bf\_4>

**bf\_3. Have you paid for one or more of these uninsured services in the last year?**

- 1 yes
- 5 no
- 8 don't know
- 9 refused

**bf\_4. How clearly were the reasons why your provider was asking you to pay for the uninsured service explained to you?**

- 1 very clear
- 2 somewhat clear
- 3 not very clear
- 4 not at all clear
- 8 don't know
- 9 refused

**bf\_5. Has your provider ever offered you a yearly lump sum fee or a block fee to cover the cost of uninsured services rather than paying for them individually?**

- 1 yes
- 5 no
- 8 don't know
- 9 refused

<if bf\_5 in (5,8,9) then go to er\_1>

**bf\_6a. Approximately how much was the yearly fee?**

- Enter number of dollars
- 8 don't know
- 9 refused

**bf\_6b. Was the fee for you or for you and your family?**

- 1 for respondent
- 5 for family
- 8 don't know
- 9 refused

**bf\_7a. Where the services there were covered by the fee clearly explained to you?**

- 1 yes
- 5 No
- 8 don't know
- 9 refused

**bf\_7b. Was the reason you were being asked to pay the fee clearly explained to you?**

- 1 yes
- 5 No
- 8 don't know
- 9 refused

**bf\_7c. Were you told that paying the fee was completely voluntary?**

- 1 yes
- 5 No
- 8 don't know
- 9 refused

**bf\_7d. Were you told you had the option of paying for the uninsured services individually or as you needed them rather than paying the block fee?**

1 yes  
5 No  
8 don't know            9 refused

**bf\_8. Have you paid a yearly lump sum or block fee in the last 3 years?**

1 yes  
5 no  
8 don't know  
9 refused

<if bf\_8 in (5,8,9) then go to bf\_11>

**bf\_9. Have you paid a yearly lump sum or block fee in the last year?**

1 yes  
5 no  
8 don't know  
9 refused

**bf\_10a. Did you feel that if you had not paid the fee, it would have affected your ability to get an appointment with your provider?**

1 yes  
5 no  
8 don't know  
9 refused

**bf\_10b. Did you feel that if you had not paid the fee, it would have affected the quality of care you would receive from your provider?**

1 yes  
5 no  
8 don't know  
9 refused

<go to er\_1>

**bf\_11a. Do you feel that by refusing to pay the fee, it has affected your ability to get an appointment with your provider?**

1 yes  
5 no  
8 don't know  
9 refused

**bf\_11b. Do you feel that by refusing to pay the fee, it has affected how quickly you are able to get an appointment with your provider?**

- 1 yes
- 5 no
- 8 don't know
- 9 refused

**bf\_11c. Do you feel that by refusing to pay the fee, it has affected the quality of care you receive from your provider?**

- 1 yes
- 5 no
- 8 don't know
- 9 refused



## USE OF EMERGENCY AND WALK-IN

### EMERGENCY

**er\_1. Have you been to an emergency department because you were sick or for a health related problem in the last 12 months?**

- 1 yes
- 5 no
- 8 don't know
- 9 refused

<if er\_1 in (5,8,9) then go to wi\_1>

**er\_2. Overall, would you say the medical care that you received in the emergency department was excellent, very good, good, fair, or poor?**

- 1 excellent
- 2 very good
- 3 good
- 4 fair
- 5 poor
- 8 don't know
- 9 refused

<if famdoc = 0 then go to wi\_1>

**er\_4. The last time you went to the emergency department, was it for a condition that you think could have been treated by your provider if he or she had been available?**

- 1 yes
- 5 no
- 8 don't know
- 9 refused

<if er\_4 in (5,8,9) then go to wi\_1>

**er\_5. Which of the following was the MAIN reason you went to the emergency rather than to your provider ?**

- 1 it was an emergency
- 2 your provider was not available
- 3 you could not get an appointment with your provider
- 4 it was faster to go to the emergency
- 5 the emergency was closer
- 6 provider advised you to go to emergency
- 7 provider works out of the emergency
- 0 other, specify
- 8 don't know
- 9 refused

**er\_6. Did your provider seem informed and up-to-date about the last time you went to the emergency department?**

- 1 yes
- 5 no
- 7 has not seen provider since ED visit
- 8 don't know
- 9 refused

### **WALK-IN**

Intro: We are going to ask some questions about your experience using a walk-in clinic. For these questions, we do not mean a drop-in or walk-in clinic that is offered by your provider 's practice. We are only asking about separate walk-in clinics that your provider is not affiliated with.

**wi\_1. Have you been to a walk in clinic because you were sick or for a health related problem in the 12 months?**

- 1 yes
- 5 no
- 8 don't know
- 9 refused

<if wi\_1 in (5,8,9) then go to hcare \_1>

**wi\_2. Overall, would you say the medical care that you received at the walk-in clinic was excellent, very good, good, fair, or poor?**

- 1 excellent
- 2 very good
- 3 good
- 4 fair
- 5 poor

- 8 don't know
- 9 refused

<if famdoc = 0 then go to hcare \_1>

**wi\_4. The last time you went to a walk-in, was it for a condition that you think could have been treated by your provider if he or she had been available?**

- 1 yes
- 5 no
- 8 don't know
- 9 refused

<if wi\_4 in (5,8,9) then go to hcare\_1>

**wi\_5. Which of the following was the MAIN reason you went to the walk-in rather than to you provider ?**

- 1 your provider was not available
- 2 you could not get an appointment with your provider
- 3 it was faster to go to the walk-in
- 4 the walk-in was closer
- 5 provider advised you to go to a walk-in
- 6 it was a follow-up to a previous visit at the walk-in
- 0 other, specify
- 8 don't know
- 9 refused

## HOME CARE

Intro: Now some questions about health care services such as nursing, personal support, occupational therapy, physiotherapy, and so on that COULD BE PROVIDED to you IN YOUR HOME, rather than at a doctor's office, clinic, or hospital.

**hcare\_1. Have you received any home care services in the last year?**

- 1 yes
- 5 no
- 8 don't know
- 9 refused

```
<if hcare_1 = 1 then go to hc_3>  
<if hcare_5 = 1 then go to hc_2>  
<if hcare_5 in (8,9) then go to hc_1>
```

**hcare\_2. In the last year, did you think you needed home care services, such as nursing, personal support, occupational therapy, physiotherapy, and so on to be provided in your home?**

- 1 yes
- 5 no
- 8 don't know
- 9 refused

```
<if hcare_2 in (5,8,9) then go to hc_1>
```

**hcare\_3. In the last year, have you discussed home care needs with your provider?**

- 1 yes
- 5 no
- 8 don't know
- 9 refused

**hcare\_4. The last time you received home care services, did you or another family member pay for it or was it paid for by a government or publicly-funded program?**

- 1 by respondent or family member
- 3 by government or publicly funded program
- 5 paid by both
- 7 someone else paid
- 8 don't know
- 9 refused

```
<if hcare_4 = 7 then go to hc_5>  
<else go to hc_6>
```

**hcare\_5. And who was it that paid for the home care you received?**

As entered

**hcare\_6. Overall, would you say the home care that you received was excellent, very good, good, fair, or poor?**

- 1 excellent
- 2 very good
- 3 good
- 4 fair
- 5 poor
- 8 don't know
- 9 refused

**hcare\_7. In the last year, has your provider talked with you about the home care services you have received? For example has your provider asked if you are getting all of the home care services you need, how satisfied you are with the care, and so on?**

- 1 yes
- 5 no
- 8 don't know
- 9 refused

## HOUSEHOLD COMPOSTION

### hc\_1. Counting yourself, how many people live in your household?

1 respondent indicates they live alone  
2-9 enter number of people  
10 ten or more people live in household  
98 don't know  
99 refused

<if hc\_1 = 1 then go to birth\_yr>

### hc\_2. How many children under the age of 16 live in your household?

0 no children\nno children under 16  
1-9 enter number of children under 16  
10 ten or more children under 16  
98 don't know  
99 refused

<if hc\_2 in (0,98,99) then go to birth\_yr>

### hc\_3. Are you a parent or guardian of any of the children under 16 years of age who live in your household?

1 yes  
5 no  
8 don't know  
9 refused

<if hc\_3 in (5,8,9) then go to birth\_yr>

### hc\_4. Could you tell me the age(s) of the child/children in your household under 16?

0 less than one year old  
1-15 enter age of children  
98 don't know  
99 refused

## CHILDREN'S SECTION

**ca\_1. To help us determine which child to refer to on the following questions, can you tell me the age of your child, who will have the next birthday?**

- 0-15 enter ages
- 98 don't know
- 99 refused

<if ca\_1 in (98,99) then go to yr\_birth>

## CHILDREN'S ACCESS TO CARE WHEN SICK

**ca\_3. Do you have a pediatrician, family doctor, nurse practitioner or other regular health care provider for your child?**

- 1 yes
- 5 no
- 8 don't know
- 9 refused

<if ca\_3 in (5,8,9) then go to ca\_9>

**ca\_4. Not counting yearly check-ups or monitoring of an ongoing health issue, in the last 12 months did you want to take your child to see their provider because they were sick or you were concerned that they had a health problem?**

- 1 yes
- 5 no
- 8 don't know
- 9 refused

<if ca\_4 in (5,8,9) then go to ca\_9>

**ca\_5. Did they actually see their provider or someone else in their office?**

- 1 yes, saw own provider
- 2 yes, saw other provider in office
- 3 saw own provider and other provider
- 5 no
- 8 don't know
- 9 refused

<if ca\_5 = 5 then go to ca\_8>

<if ca\_5 in (8,9) then go to ca\_9>

**ca\_6. How many days did it take from when they first tried to see their provider to when they actually saw them or someone else in their office?**

- 0 saw the doctor the same day
- 1 saw doctor next day
- 2-19 Enter number of days
- 20 twenty or more days
- 98 don't know
- 99 refused

#### **CHILDREN'S USE OF EMERGENCY**

**ca\_9. Have you taken your child to an emergency department because they were sick or for a health related problem in the last 12 months?**

- 1 yes
- 5 no
- 8 don't know
- 9 refused

#### **CHILDREN'S USE OF A WALK-IN**

**ca\_13. Have you taken your child to a walk in clinic because they were sick or for a health related problem in the 12 months?**

- 1 yes
- 5 no
- 8 don't know
- 9 refused



## SOCIODEMOGRAPHICS

### birth\_yr. In what year were you born?

1900-1997 enter year  
9998 don't know  
9999 refused

<if birth\_yr= 9999 then go to agegroup>

### birth\_mth. And in what month was that?

|               |            |             |
|---------------|------------|-------------|
| 1 January     | 5 May      | 9 September |
| 2 February    | 6 June     | 10 October  |
| 3 March       | 7 July     | 11 November |
| 4 April       | 8 August   | 12 December |
| 98 don't know | 99 refused |             |

<if birth\_mth in (1 to 12) then go to edu>

**agegroup (for those who do not answer birth\_yr and birth\_mth). The information collected in the study is more valuable when we know the age of the people who participated. Now we don't need your exact age, but would you please tell me if you are:**

- 1 16-24 years of age
- 2 25-34 years of age
- 3 35-44 years of age
- 4 45-54 years of age
- 5 55-64 years of age
- 6 65-74 years of age
- 7 75 years of age or older

### edu. What is the highest level of education you have completed to date?

- 1 less than high school
- 2 some high school
- 3 high school graduate or equivalent
- 4 some community college, technical, trade, or vocational college
- 5 completed community college, technical, trade, or vocational college
- 6 some university but no degree
- 7 completed bachelor's degree (Arts, Science, Eng, etc.)
- 8 post graduate training: MA, MSc, MLS, MSW, MBA, etc.
- 9 post graduate training: PhD, "doctorate"
- 10 professional degree (Law, Medicine, Dentistry)
- 98 don't know
- 99 refused

**birthplace. In what country were you born?**

- |                                                            |                             |
|------------------------------------------------------------|-----------------------------|
| 1 Canada                                                   | 38 Pakistan                 |
| 2 United States                                            | 39 Philippines              |
| 3 China, Hong Kong, Taiwan                                 | 42 Russia/USSR/Soviet Union |
| 4 France                                                   | 44 Serbia                   |
| 5 Germany                                                  | 46 Somalia                  |
| 6 India                                                    | 47 Czechoslovakia/Slovakia  |
| 7 Italy                                                    | 48 Spain                    |
| 8 Netherlands (Holland)                                    | 49 Sri Lanka                |
| 9 Poland                                                   | 50 Sweden                   |
| 10 Portugal                                                | 51 Switzerland              |
| 11 Denmark                                                 | 52 Trinidad                 |
| 13 England, Scotland, Ireland,<br>UK, Wales, Great Britain | 53 Ukraine                  |
| 14 El Salvador                                             | 54 Vietnam                  |
| 15 Ethiopia                                                | 55 Yugoslavia               |
| 17 Finland                                                 | 56 Bangladesh               |
| 19 Greece                                                  | 57 Iran/Iraq                |
| 20 Guyana                                                  | 58 Other Europe             |
| 21 Haiti                                                   | 59 Other Asia               |
| 23 Hungary                                                 | 60 Other Central America    |
| 27 Israel                                                  | 61 Other South America      |
| 28 Jamaica                                                 | 62 Other Africa             |
| 29 Japan                                                   | 63 Other Caribbean          |
| 31 Korea (North & South)                                   | 64 Other Middle East        |
| 32 Lebanon                                                 | 65 Other North African      |
| 33 Macedonia                                               | 67 South Pacific            |
| 34 NZ & Australia                                          | 0 Not codeable              |
| 36 Nigeria                                                 | 98 don't know               |
| 37 Norway                                                  | 99 refused                  |

<if birthplace in (1,98,99) then go to lang\_2>

**imm. In what year did you come to Canada?**

- 1900-2014 enter year  
9998 don't know  
9999 refused

**lang\_2. What language do you speak most often at home?**

- |                            |                                    |
|----------------------------|------------------------------------|
| 1 English                  | 20 African language                |
| 2 French                   | 21 Chinese (Mandarin or Cantonese) |
| 3 English & French         | 22 Filipino or Tagalog             |
| 4 English & other          | 23 Vietnamese                      |
| 5 Czech                    | 24 Other Asian language            |
| 6 Croatian                 | 25 Hindi                           |
| 7 Danish                   | 26 Punjabi                         |
| 8 Dutch                    | 27 Tamil                           |
| 9 German                   | 28 Urdu                            |
| 10 Greek                   | 29 Other East Indian language      |
| 11 Hungarian               | 30 Hispanic languages              |
| 12 Italian                 | 31 Arabic                          |
| 13 Polish                  | 32 Other Middle Eastern languages  |
| 14 Portuguese              | 33 Native & Aboriginal languages   |
| 15 Russian                 | 0 Other, specify                   |
| 16 Spanish                 | 97 Not codeable                    |
| 17 Ukrainian               | 98 Don't know                      |
| 18 Yugoslavian             | 99 Refused                         |
| 19 Other European language |                                    |

**fin\_sit. Which of the following words best describes your current financial situation: very comfortable, comfortable, tight, very tight, or poor?**

- 1 very comfortable
- 2 comfortable
- 3 tight
- 4 very tight
- 5 poor
- 8 don't know
- 9 refused

**inc1. Could you please tell me how much income you and other members of your household received in the year ending December 31<sup>st</sup> 2013, before taxes. Please include income from all sources such as savings, pensions, rent, as well as wages. To the nearest thousand dollars, what was your total household income before taxes and other deductions were made?**

- 0 less than one thousand dollars
- 1-997 enter amount (2 for \$2,000, 20 for \$20,000, 120 for \$120,000, etc.)
- 998 don't know
- 999 refused

<if inc\_1 in (998,999) then go to inc2>

<else go to in\_postal>

**inc2 (for those who refuse inc1). We don't need the exact amount; could you tell me which of these broad categories it falls into?**

- 1 less than \$20,000
- 2 between \$20,000 and \$30,000 (\$29,999.99)
- 3 between \$30,000 and \$40,000
- 4 between \$40,000 and \$50,000
- 5 between \$50,000 and \$60,000
- 6 between \$60,000 and \$70,000
- 7 between \$70,000 and \$80,000
- 8 between \$80,000 and \$90,000
- 9 between \$90,000 and \$100,000
- 10 between \$100,000 and \$120,000
- 11 between \$120,000 and \$150,000
- 12 more than \$150,000
- 98 don't know
- 99 refused

## POSTAL CODE

**postcode.** Can you tell me your postal code?

As entered

## PERMISSION TO LINK/FOLLOW UP

**permis\_1. Understanding the relationship between people's health, and how often see a doctor, have been hospitalized, and so on, is important to delivering effective health care in Ontario. The ministry would like to use your responses, and share them with authorized health organizations, so that both the ministry and the organizations can research, analyze and evaluate Ontario's health care system. Are you willing to permit the ministry and the authorized health organizations to do this?**

- 1 yes
- 5 no
- 8 don't know
- 9 refused

**followup\_1. Would you be interested in talking to the ministry, and their researchers, again?**

- 1 yes
- 5 no
- 8 don't know
- 9 refused

<if followup\_1 in (5,8,9) 1 then go to eval\_1>

**fname. Could you please tell me your first name so we know who to ask for if we do call back?**

As entered

## EVALUATION

**eval\_1. Did you find any questions hard to understand, confusing, or unclear?**

- 1 yes
- 5 no
- 8 don't know
- 9 refused

<if eval\_1 in (5,8,9) then go to end>

**eval\_2. Which questions did you find hard to understand, confusing, or unclear?**

As entered
